# Supplementary material
Source: publisher figshare collection journal article supplement (https://tandf.figshare.com/articles/dataset/_/11744811)
Supplement: Supplementary file 1 [file 1]

Archive with 3 entries (3 files):
- english editing.pdf
- survey.pdf
- table (supp).docx
