# Supplementary material
Source: publisher figshare collection journal article supplement (https://tandf.figshare.com/articles/dataset/_/11744811)
Supplement: Supplementary file 1 [file 1 › english editing.pdf]

This document certifies that the manuscript

**CARDIOLOGISTS AND CARDIOVASCULAR SURGEONS' ATTITUDE TOWARD MANAGING  
ENDODONTIC INFECTION AND ORAL HEALTH IN PATIENTS WITH CARDIOVASCULAR  
DISEASES: A WEB-BASED SURVEY STUDY**

prepared by the authors

**Betul Aycan ALIM, Mehmet Burak GUNESER, Asiye Nur DINCER**

was edited for proper English language, grammar, punctuation, spelling, and overall style  
by one or more of the highly qualified native English speaking editors at AJE.

This certificate was issued on **October 11, 2019** and may be verified  
on the [AJE website](https://aje.com) using the verification code **040B-B34C-C37B-0A49-E95E**.

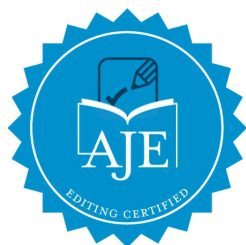

Neither the research content nor the authors' intentions were altered in any way during the editing process. Documents receiving this certification should be English-ready for publication; however, the author has the ability to accept or reject our suggestions and changes. To verify the final AJE edited version, please visit our verification page at [aje.com/certificate](https://aje.com/certificate). If you have any questions or concerns about this edited document, please contact AJE at [support@aje.com](mailto:support@aje.com).
