# Supplementary material
Source: publisher figshare collection journal article supplement (https://tandf.figshare.com/articles/dataset/_/11744811)
Supplement: Supplementary file 1 [file 1 › survey.pdf]

**1. Gender:**

- A. Male
- B. Female

**2. Age:**

**3. Speciality:**

- A. Cardiologist
- B. Cardiovascular surgeon

**4. Years in practice:**

**5. Institution:**

- A. Public Hospital
- B. Private Office
- C. Private Hospital

**6. Please assess your level of knowledge about oral health.**

- A. Adequate
- B. Moderate
- C. Inadequate

**7. Are endodontic infections important diseases which should be treated?**

- A. Yes
- B. No
- C. I don't know

**8. Which of the following are possible clinical or radiological signs of endodontic infection? (Check all that apply)**

- ☐ Periapical Radiolucent Area
- ☐ Swelling
- ☐ Intraoral Sinus Tract
- ☐ Extraoral Sinus Tract
- ☐ Pain

**9. Could the heart health of cardiac patients with endodontic infections be negatively affected by this infection?**

- A. Yes
- B. No
- C. I don't know

**10. Do you recommend that treatment of endodontic infection be performed prior to cardiac surgery?**

- A. Yes
- B. No
- C. I don't know

**11. How important is oral care for a patient with CVD?**

- A. Always
- B. In case of any risk
- C. Never

**12. Do you ask questions about oral health to your patients during your examination?**

- A. Yes
- B. No

**13. Do you examine patients' mouths visually?**

- A. Yes
- B. No

**14. If your answer is "yes", when do you refer patients to a dentist?**

- A. Prior to the cardiovascular operation for a routine dental control
- B. If the patient mentioned a dental problem

**15. How often do you inform your patients about the importance of oral care?**

- A. Always
- B. In case of any risk
- C. Never

**16. Which of the following dental procedures require antibiotic prophylaxis (if you think the patient need prophylaxis) (Check all that apply)**

- ☐ Tooth Extraction
- ☐ Root Canal Treatment
- ☐ Dental Implant Application
- ☐ Post Placement In Root Canal
- ☐ Scaling or Root Planing
- ☐ Restorative Treatment
- ☐ Incision, Drainage or Other
- ☐ Applications in Infected Tissues
- ☐ Routine Anesthetic Injections Through Non-Infected Tissue
- ☐ Taking Dental Radiograph
- ☐ Shedding of Deciduous Teeth
