# Supplementary material
Source: publisher figshare collection journal article supplement (https://tandf.figshare.com/articles/dataset/_/11744811)
Supplement: Supplementary file 1 [file 1 › table (supp).docx]

|  | **All participants**  **n (%)** | **1-10**  **years**  **n (%)** | **11-20**  **years**  **n (%)** | **21-30**  **years**  **n (%)** | **31-40**  **years**  **n (%)** | **41-50**  **years**  **n (%)** | P |
| --- | --- | --- | --- | --- | --- | --- | --- |
| **Is endodontic infection an important disease which should be treated?** |  | 156 (35.1%) | 181  (40.7%) | 81  (18.3%) | 22  (5%) | 4  (0.9%) |  |
| Yes | 406 (91.4) | 142 (91) | 165 (91.2) | 74 (91.3) | 22 (100) | 3 (75) |  |
| No | 0 (0) | 0 (0) | 0 (0) | 0 (0) | 0 (0) | 0 (0) | 0.750 |
| I don’t know | 38 (8.6) | 14 (9) | 16 (8.8) | 7 (8.7) | 0 | 1 (25) |  |
| **Could the heart health of cardiac patients with endodontic infections be negatively affected by this infection?** |  |  |  |  |  |  |  |
| Yes | 432 (97.3) | 150 (97,3) | 176 (97.2) | 80 (98.7) | 22 (100) | 4 (100) |  |
| No | 2 (0.45) | 0 (0) | 2 (1.1) | 0 (0) | 0 (0) | 0 (0) | 0.792 |
| I don’t know | 10 (2.25) | 6 (2,7) | 3 (1.7) | 1 (0.3) | 0 (0) | 0 (0) |
| **Do you recommend that treatment of endodontic infection be performed prior to cardiac surgery?** |  |  |  |  |  |  |  |
| Yes | 396 (89.2) | 137 (87.8) | 159 (87.8) | 76 (93.8) | 20 (90.9) | 4 (100) |  |
| No | 22 (5) | 10 (6.4) | 9 (5) | 3 (3.7) | 0 (0) | 0 (0) | 0.726 |
| I don’t know | 26 (5.8) | 9 (5.8) | 13 (7.2) | 2 (2.5) | 2 (9.1) | 0 (0) |
| **Do you ask questions about oral health to your patients during your examination?** |  |  |  |  |  |  |  |
| Yes | 236 (53.2) | 78 (50) | 99 (54.7) | 41 (50.6) | 15 (68.2) | 3 (75) | 0.438 |
| No | 208 (46.8) | 78 (50) | 82 (45.3) | 40 (49.4) | 7 (31.8) | 1 (25) |
| **Do you make an oral examination?** |  |  |  |  |  |  |  |
| Yes | 116 (26.1) | 34 (21.8) | 53 (29.2) | 20 (24.7) | 8 (36.3) | 1 (25) | 0.443 |
| No | 328 (73.9) | 122 (78.2) | 128 (60.8) | 61 (75..3) | 14 (63.7) | 3 (75) |
| **Do you refer your patients to a dentist?** |  |  |  |  |  |  |  |
| Yes | 322 (72.5) | 106 (68,6) | 138 (80,3) | 57 (70.4) | 17 (77.3) | 4 (100) | 0.702 |
| No | 122 (27.5) | 50 (31,4) | 43 (19,7) | 24 (29.6) | 5 (22.7) | 0 (0) |  |
| **How often do you inform your patients about the importance of oral care?** |  |  |  |  |  |  |  |
| Always | 92 (20.7) | 33 (21.1) | 34 (18.8) | 20 (24.7) | 5 (22.7) | 0 (0) |  |
| In case of a risk | 316 (71.2) | 107 (68.6) | 132 (73) | 56 (59.1) | 17 (77.3) | 4 (100) | 0.822 |
| Never | 36 (8.1) | 16 (10.3) | 15 (8.2) | 5 (6.2) | 0 (0) | 0 (0) |  |

# Table. Responses of the participants according to years of practice (n: sample size) (P < 0.05)
